# Supplementary material for: Myostatin-1 Inhibits Cell Proliferation by Inhibiting the mTOR Signal Pathway and MRFs, and Activating the Ubiquitin-Proteasomal System in Skeletal Muscle Cells of Japanese Flounder Paralichthys olivaceus
Source: PubMed Central journal article supplement (PMC7692286; doi:10.3390/cells9112376), 2020-10-29
Supplement: cells-09-02376-s001.pdf [file cells-09-02376-s001.pdf]

Article

# Myostatin-1 Inhibits Cell Proliferation by Inhibiting the mTOR Signal Pathway and MRFs, and Activating the Ubiquitin-Proteasomal System in Skeletal Muscle Cells of Japanese Flounder *Paralichthys olivaceus*

Jiahuan Liu, Mingzhu Pan, Dong Huang, Yanlin Guo, Mengxi Yang, Wenbing Zhang \* and Kangsen Mai

The Key Laboratory of Aquaculture Nutrition and Feeds (Ministry of Agriculture and Rural Affairs); the Key Laboratory of Mariculture (Ministry of Education), Ocean University of China, Qingdao 266003, China; liujiahuan@stu.ouc.edu.cn (J.L.); pmz@stu.ouc.edu.cn (M.P.); huangdong@stu.ouc.edu.cn (D.H.); guoyanlin@stu.ouc.edu.cn (Y.G.); ymx@stu.ouc.edu.cn (M.Y.); wzhang@ouc.edu.cn (W. Z.); kmai@ouc.edu.cn (K.M.)

\* Correspondence: wzhang@ouc.edu.cn; Tel.: +86-532-8203-2145

**Table S1.** List of siRNA used for *mstn-1* interfering.

| siRNA               | Sense (5'-3')         | Antisense (5'-3')     |
|---------------------|-----------------------|-----------------------|
| siRNA-162           | GCGACUAAACGCGAUCAUATT | UAUGAUCGCGUUUAGUCGCTT |
| siRNA-315           | GGAUGUGGUCAUGGAGGAUTT | AUCCUCCAUGACCACAUCCTT |
| siRNA-578           | CCCUGAAGAUUGACGUGAATT | UUCACGUCAAUCUUCAGGGTT |
| siRNA-677           | GCAUCGAGAUUAACGCCUUTT | AAGGCGUAAUCUCGAUGCTT  |
| siRNA-912           | GCGCUACAAGGCCAACUAUTT | AUAGUUGGCCUUGUAGCGCTT |
| siRNA-1070          | GCAAAGAGCAGAUCAUCUATT | UAGAUGAUCUGCUCUUUGCTT |
| <i>Simstn-1</i> -NC | UUCUCCGAACGUGUCACGUTT | ACGUGACACGUUCGGAGAATT |
